# Supplementary material for: In vivo mRNA delivery to virus-specific T cells by light-induced ligand exchange of MHC class I antigen-presenting nanoparticles
Source: PubMed Central journal article supplement — Sci Adv. 2022 Feb 23;8(8):eabm7950. doi: 10.1126/sciadv.abm7950 (PMC8865765; doi:10.1126/sciadv.abm7950), 2022-02-23
Supplement: sciadv.abm7950_sm.pdf [file sciadv.abm7950_sm.pdf]

Supplementary Materials for

**In vivo mRNA delivery to virus-specific T cells by light-induced ligand exchange of MHC class I antigen-presenting nanoparticles**

Fang-Yi Su, Qingyang Henry Zhao, Shreyas N. Dahotre, Lena Gamboa, Swapnil Subhash Bawage, Aaron D. Silva Trenkle, Ali Zamat, Hathaichanok Phuengkham, Rafi Ahmed, Philip J. Santangelo, Gabriel A. Kwong\*

\*Corresponding author. Email: [gkwong@gatech.edu](mailto:gkwong@gatech.edu)

Published 23 February 2022, *Sci. Adv.* **8**, eabm7950 (2022)

DOI: [10.1126/sciadv.abm7950](https://doi.org/10.1126/sciadv.abm7950)

**This PDF file includes:**

Figs. S1 to S6  
Tables S1 and S2

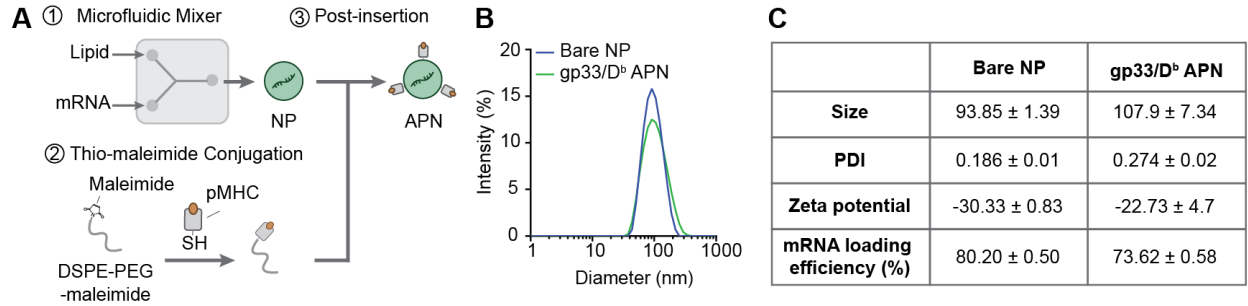

**Fig. S1. Synthesis and characterization of antigen-presenting nanoparticles (APNs).** (A) Schematic of the generation of APNs using microfluidic mixers and post-insertion technique. (B) Uniform distribution of the synthesized bare nanoparticles (NPs) and APNs functionalized with GP33/D<sup>b</sup> APN. (C) Hydrodynamic size, polydispersity index (PDI), zeta potential, and mRNA loading of the produced NPs. Data are presented as mean ± S.D. n = 3 technical replicates.

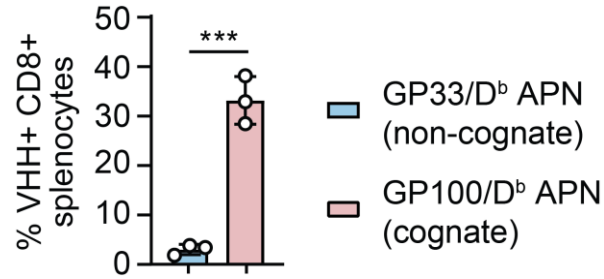

**Fig. S2. *In vivo* APN-mediated transfection in CD8<sup>+</sup> splenocytes isolated from Pmel TCR transgenic mice.** \*\*\* $P < 0.001$  between GP33/D<sup>b</sup> APNs (non-cognate) and GP100/D<sup>b</sup> APNs (cognate); one-way ANOVA and Tukey post-test and correction. All data are means  $\pm$  SD;  $n = 3$  biologically independent mice.

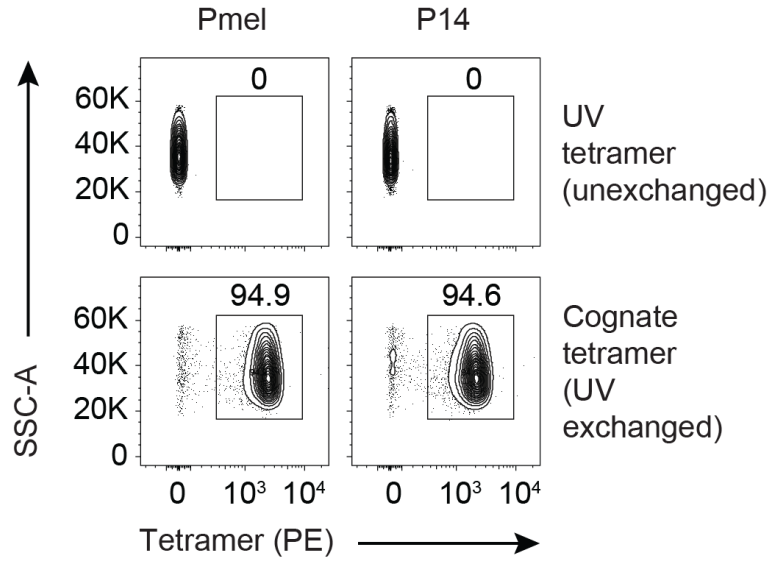

**Fig. S3. UV tetramers (unexchanged) did not cause non-specific binding to CD8<sup>+</sup> splenocytes from P14 and Pmel TCR transgenic mice.** Representative flow plots of CD8<sup>+</sup> splenocytes staining with UV tetramers or UV exchanged cognate tetramers. Frequencies depicted are based on gating on CD8<sup>+</sup> cells.

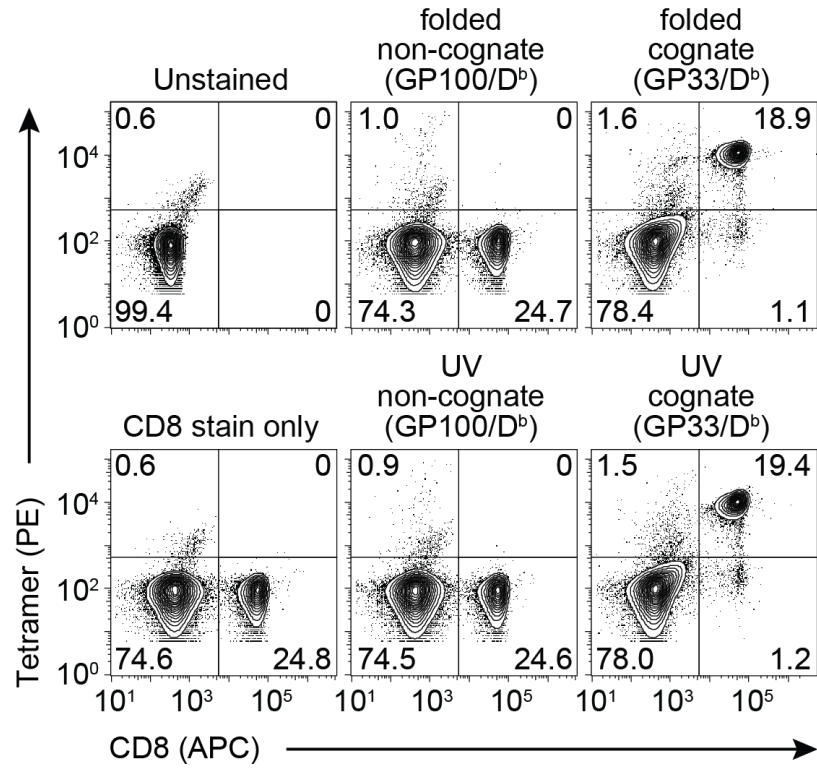

**Fig. S4. UV-exchanged tetramers bound to P14 CD8 splenocytes comparably to the folded counterpart.** Dot plots of flow cytometry analysis for P14 splenocytes stained with cognate (GP33/D<sup>b</sup>) tetramer and non-cognate (GP100/D<sup>b</sup>) tetramer prepared by conventional folding protocol (folded) or UV-mediated ligand exchange protocol (UV).

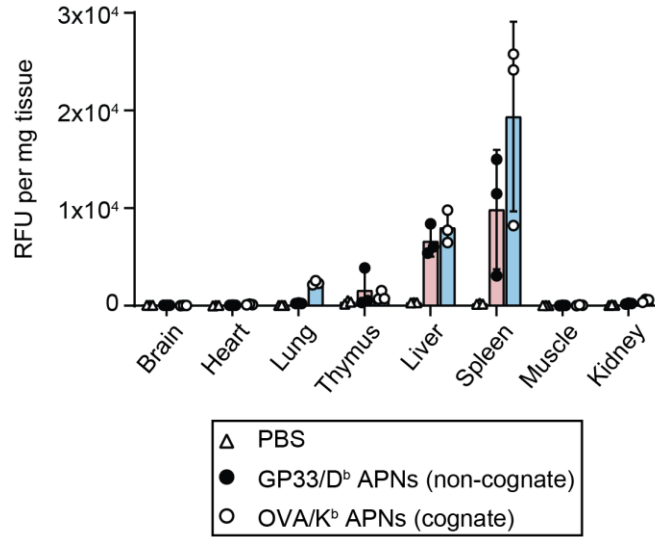

**Fig. S5. Biodistribution of DiR-labeled APNs.** Quantification of DiR fluorescent signal in each organ. Each symbol indicates one measured organ. All data are means  $\pm$  SD; n = 3 biologically independent mice.

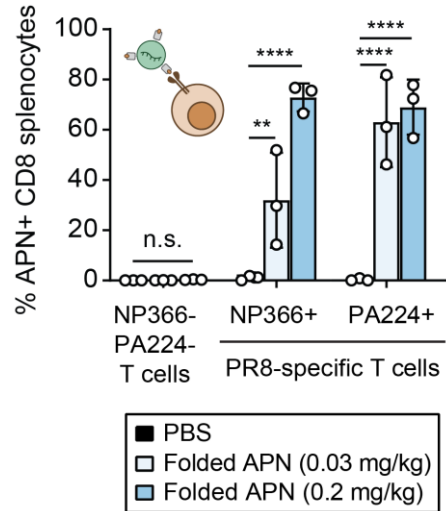

**Fig. S6. Dose-dependent APN targeting to two immunodominant flu-specific T cells in PR8 model.** Infected mice were intravenously injected with a mixture of folded NP366/D<sup>b</sup> APNs and PA224/D<sup>b</sup> APNs. n.s. = not significant where  $P > 0.9999$  between PBS and folded APNs (0.03 mg/kg total mRNA dose) as well as between PBS and folded APNs (0.2 mg/kg) in NP366-PA224-T cells;  $**P = 0.0033$  between PBS and folded APNs (0.03 mg/kg) in NP366+ flu-specific T cell population (NP366+);  $****P < 0.0001$ ; two-way ANOVA and Sidak post-test and correction. All data are means  $\pm$  SD;  $n = 3$  biologically independent mice.

**Table S1. Quantification of pMHC on APNs using BCA assay kit.**

| APN formulation            | Bare NP | UV PA224/D <sup>b</sup> APN | UV GP33/D <sup>b</sup> APN |
|----------------------------|---------|-----------------------------|----------------------------|
| pMHC concentration (μg/mL) | 13.21   | 297.97                      | 265.74                     |
| pMHC (μg/μg lipids)        | 0.033   | 0.745                       | 0.664                      |



**Table S2. List of staining reagents for flow cytometry analysis.**

| <b>REAGENT</b>                              |                     |              |               |                   |                              |
|---------------------------------------------|---------------------|--------------|---------------|-------------------|------------------------------|
| <b>Antibodies</b>                           |                     |              |               |                   |                              |
| <b>Target</b>                               | <b>Fluorochrome</b> | <b>Clone</b> | <b>Source</b> | <b>Identifier</b> | <b>Working concentration</b> |
| Camelid VHH                                 | iFluor488           | 96A3F5       | Genscript     | A01862            | 5 µg/mL                      |
| CD8                                         | APC                 | 53-6.7       | Biologend     | 100712            | 2 µg/mL                      |
| CD8                                         | PE                  | 53-6.7       | BD            | 561095            | 2 µg/mL                      |
| CD4                                         | PerCP/Cy5.5         | RM4-2        | TONBO         | 65-0042-U100      | 2 µg/mL                      |
| NK1.1                                       | PerCP/Cy5.5         | PK136        | TONBO         | 65-5941-U100      | 2 µg/mL                      |
| B220                                        | PerCP/Cy5.5         | RA3-6B2      | TONBO         | 65-0452-U100      | 2 µg/mL                      |
| CD31                                        | PerCP/Cy5.5         | MEC13.3      | Biologend     | 102522            | 2 µg/mL                      |
| CD45                                        | PE/Cy7              | 30-F11       | Biologend     | 103114            | 2 µg/mL                      |
| CD11b                                       | BV421               | M1/70        | Biologend     | 101235            | 2 µg/mL                      |
| CD11c                                       | BV605               | N418         | Biologend     | 117333            | 2 µg/mL                      |
| Ly6c                                        | BV785               | HK1.4        | Biologend     | 128041            | 2 µg/mL                      |
| F4/80                                       | BV421               | BM8          | Biologend     | 123131            | 2 µg/mL                      |
| <b>Other reagents</b>                       |                     |              |               |                   |                              |
| Streptavidin                                | PE                  |              | Invitrogen    | S866              | 10 µg/mL                     |
| Streptavidin                                | APC                 |              | Invitrogen    | S868              | 6.66 µg/mL                   |
| Streptavidin                                | BV421               |              | Biologend     | 405225            | 2 µg/mL                      |
| LIVE/DEAD™ Fixable Aqua Dead Cell Stain Kit |                     |              | Invitrogen    | L34957            |                              |
